# Supplementary material for: Subtractive Low-Temperature Preparation Route for Porous SiO2 Used for the Catalyst-Assisted Growth of ZnO Field Emitters
Source: MDPI journal article supplement (doi:10.3390/nano11123357), 2021-12-10
Supplement: s1 [file s1]

## Supplementary Materials:

# Subtractive Low-Temperature Preparation Route for Porous SiO<sub>2</sub> Used for the Catalyst-Assisted Growth of ZnO Field Emitters

Stefanie Haugg<sup>1</sup>, Carina Hedrich<sup>1</sup>, Robert H. Blick<sup>1,2</sup> and Robert Zierold<sup>1,\*</sup>

<sup>1</sup> Center for Hybrid Nanostructures (CHyN), Universität Hamburg, 22761 Hamburg, Germany; shaugg@physnet.uni-hamburg.de (S.H.); chedrich@physnet.uni-hamburg.de (C.H.); rblick@physnet.uni-hamburg.de (R.H.B.)

<sup>2</sup> Material Science and Engineering, College of Engineering, University of Wisconsin-Madison, Madison, Wisconsin 53706, USA

\* Correspondence: rzierold@physik.uni-hamburg.de

## Synthesis of Porous SiO<sub>2</sub> on Free-Standing Membranes

For the synthesis of the porous SiO<sub>2</sub> film on a free-standing membrane, first a SiN<sub>y</sub> membrane substrate was fabricated from a commercially bought Si wafer that is covered on both sides with LPCVD SiN<sub>y</sub>. Second, the free-standing SiN<sub>y</sub> membrane was coated by PECVD with a layer of SiO<sub>2</sub>, followed by a layer of SiO<sub>x</sub>N<sub>y</sub>. Third, the SiO<sub>x</sub>N<sub>y</sub>/SiO<sub>2</sub>/SiN<sub>y</sub> membrane is etched for 90 min in heated H<sub>3</sub>PO<sub>4</sub>, which leads to the generation of a porous SiO<sub>2</sub> layer. Thereby, the effective RI is reduced from 1.474 (SiO<sub>x</sub>N<sub>y</sub>) to 1.290 (porous SiO<sub>2</sub>).

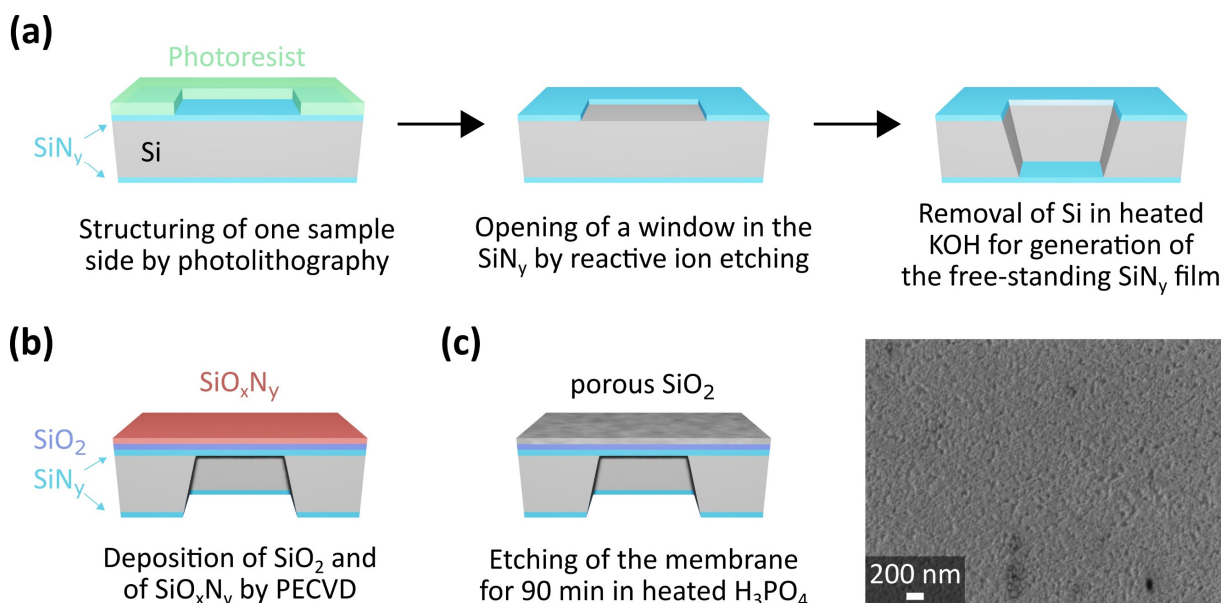

**Figure S1:** Synthesis steps for the porous SiO<sub>2</sub> on a free-standing membrane. **(a)** The SiN<sub>y</sub> membrane was fabricated from a Si wafer with LPCVD SiN<sub>y</sub> on both sides. After a mask was defined on one side of the sample by photolithography, a window was opened in the SiN<sub>y</sub> film by reactive ion etching. Then, the heated KOH (30 %, 80 °C) was used to remove the Si substrate, which led to the generation of a free-standing SiN<sub>y</sub> film. **(b)** SiO<sub>2</sub> and SiO<sub>x</sub>N<sub>y</sub> were successively deposited by PECVD without a vacuum break. **(c)** A porous SiO<sub>2</sub> layer was generated on the surface of the membrane by wet etching in heated H<sub>3</sub>PO<sub>4</sub>. The SEM image of the porous layer on a membrane was taken with the Crossbeam 550 by Zeiss.
